# Supplementary material for: Red Sea Bream Iridovirus Kinetics, Tissue Tropism, and Interspecies Horizontal Transmission in Flathead Grey Mullets (Mugil cephalus)
Source: MDPI journal article supplement (doi:10.3390/ani13081341), 2023-04-13
Supplement: s1 [file s1]

## Supplementary Material

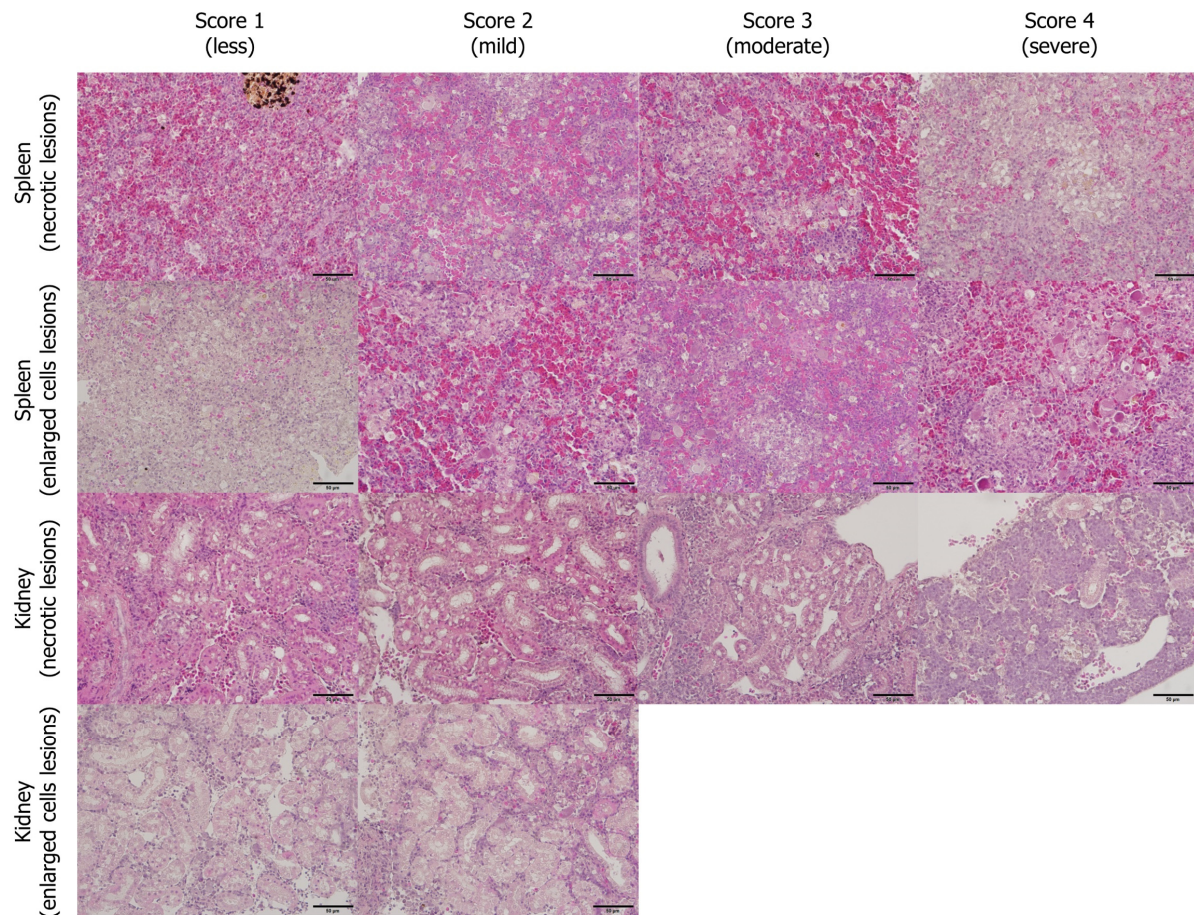

**Figure S1.** Scoring of lesions: Histopathological scoring of the lesions of red sea bream iri-dovirus-induced necrotizing lesions and enlarged cells lesions in the flathead grey mullet (*Mugil cephalus*) spleen and kidney tissues (haematoxylin and eosin stain, bar = 50 µm).
